# Supplementary material for: Implications of Crop Rotation and Fungicide on Fusarium and Mycotoxin Spectra in Manitoba Barley, 2017–2019
Source: MDPI journal article supplement (doi:10.3390/toxins14070463), 2022-07-06
Supplement: s1 [file s1]

# Supplementary Materials: Implications of Crop Rotation and Fungicide on *Fusarium* and Mycotoxin Spectra in Manitoba Barley, 2017-2019

**Table S1.** *Fusarium* Species/Chemotype-specific Primers with Sequences.

| Target <i>Fusarium</i> spp. | Primer Name | Sequences (5'-3')           | References |
|-----------------------------|-------------|-----------------------------|------------|
| A. Conventional PCR         |             |                             |            |
| <i>F. poae</i>              | Fp82F       | CAAGCAAACAGGCTCTTCACC       | [1]        |
|                             | Fp82R       | TGTTCCACCTCAGTGACAGGTT      |            |
| <i>F. graminearum</i>       | Fg16F       | CTCCGGATATGTTGCGTCAA        |            |
|                             | Fg16R       | GGTAGGTATCCGACATGGCAA       |            |
| <i>F. sporotrichioides</i>  | FspF        | CGCACGTATAGATGGACAAG        |            |
|                             | FspR        | GTCAGAAGAGACGCATCCGCC       |            |
| <i>F. avenaceum</i>         | FaF         | CAAGCATTGTCGCCACTCTC        |            |
|                             | FaR         | GTTTGGCTCTACCGGGACTG        |            |
| <i>F. equiseti</i>          | FEF1        | CATACCTATACGTTGCCTCG        |            |
|                             | FER1        | TTACCAGTAACGAGGTGTATG       |            |
| B. Quantitative PCR         |             |                             |            |
| <i>F. poae</i>              | FpA51F      | ACCGAATCTCAACTCCGCTTT       | [2]        |
|                             | FpA98R      | GTCTGTCAAGCATGTTAGCACAAGT   |            |
| <i>F. graminearum</i>       | FgB397F     | CCATTCCCTGGGCGCT            |            |
|                             | FgB411R     | CCTATTGACAGGTGGTTAGTGACTGG  |            |
| <i>F. sporotrichioides</i>  | FspA18F     | GCAAGTCGACCACTGTGAGTACA     |            |
|                             | FspA85R     | CTGTCAAAGCATGTCAGTAAAAATGAT |            |
| C. Chemotype Detection      |             |                             |            |
| <i>F. graminearum</i>       | 3CON        | TGGCAAAGACTGGTTCAC          | [3]        |
|                             | 3NA         | GTGCACAGAATATACGAGC         |            |
|                             | 3D15A       | ACTGACCCAAGCTGCCATC         |            |
|                             | 3D3A        | CGCATTGGCTAACACATG          |            |
| <i>F. poae</i>              | nivPF       | TATCCTTGCAATGGCAATGCC       | [4]        |
|                             | nivPR       | AAATGGCGATACGAGTATTGA       |            |

**Table S2:** Precursor and Product Ions (m/z), Retention Times, and Recoveries of Various Mycotoxins from Barley Grains

| <b>Mycotoxin (Abbreviation)</b> | <b>Precursor Ion (m/z)</b> | <b>Product Ion (m/z)</b> | <b>Retention Time (min)</b> | <b>Recoveries Mean <math>\pm</math> SD</b> |
|---------------------------------|----------------------------|--------------------------|-----------------------------|--------------------------------------------|
| Deoxynivalenol (DON)            | 297.1333                   | 203.1065; 231.1014       | 4.39                        | 91 $\pm$ 7                                 |
| Diacetoxyscirpenol (DAS)        | 384.2017                   | 307.1554; 205.0857       | 8.67                        | 95 $\pm$ 6                                 |
| Nivalenol (NIV)                 | 313.1282                   | 175.0752; 229.0858       | 3.36                        | 81 $\pm$ 6                                 |
| Beauvericin (BEA)               | 801.4433                   | 244.1327; 262.1432       | 13.82                       | 47 $\pm$ 9                                 |
| HT-2 Toxin (HT-2)               | 442.2435                   | 263.1277; 215.1067       | 9.76                        | 94 $\pm$ 5                                 |
| T-2 Toxin (T-2)                 | 484.2541                   | 215.1067; 185.0960       | 10.54                       | 119 $\pm$ 6                                |
| Enniatin A (ENN A)              | 699.4903                   | 682.4638; 210.1488       | 14.28                       | 61 $\pm$ 6                                 |
| Enniatin A1 (ENN A1)            | 685.4746                   | 668.4480; 210.1488       | 14.11                       | 63 $\pm$ 7                                 |
| Enniatin B (ENN B)              | 657.4433                   | 640.4166; 196.1331       | 13.68                       | 55 $\pm$ 4                                 |
| Enniatin B1 (ENN B1)            | 671.4903                   | 654.4324; 196.1331       | 13.91                       | 57 $\pm$ 3                                 |

<sup>a</sup> Number of spiked samples,  $n = 9$

**Table S3** Climatic Properties (Temperature and Precipitation) across Manitoba Crop Districts in July during the FHB Survey (2016-2019).

| Manitoba crop districts | July temperature (°C) |      |      |      | July precipitation (mm) |      |      |      |
|-------------------------|-----------------------|------|------|------|-------------------------|------|------|------|
|                         | 2016                  | 2017 | 2018 | 2019 | 2016                    | 2017 | 2018 | 2019 |
| Central (CMB)           | 19.4                  | 19.8 | 20.3 | 19.8 | 106.6                   | 37.6 | 50.2 | 63.4 |
| Southwest (SWMB)        | 18.8                  | 19.4 | 19.4 | 19.6 | 85.4                    | 40.5 | 34.2 | 55.6 |
| Eastern (EMB)           | 20.3                  | 20.9 | 21.1 | 20.1 | 88.2                    | 56.7 | 44.3 | 61.3 |
| Northwest (NWMB)        | 18.6                  | 19.9 | 19.7 | 19.2 | 84.5                    | 31.2 | 42.1 | 40.6 |
| Interlake (INMB)        | 18.8                  | 18.8 | 19.4 | 19.1 | 52.2                    | 72.3 | 71.2 | 74.3 |
| Provincial mean         | 19.2                  | 19.8 | 20.0 | 19.6 | 83.4                    | 47.7 | 48.4 | 59.0 |

Note: Manitoba local climate data retrieved from [www.gov.mb.ca/agriculture/weather/](http://www.gov.mb.ca/agriculture/weather/) and [https://climate.weather.gc.ca/historical\\_data/search\\_historic\\_data\\_e.html](https://climate.weather.gc.ca/historical_data/search_historic_data_e.html)



## Reference:

1. Demeke, T.; Clear, R.M.; Patrick, S.K.; Gaba, D. Species-specific PCR-based assays for the detection of *Fusarium* species and a comparison with the whole seed agar plate method and trichothecene analysis. *International Journal of Food Microbiology* **2005**, *103*, 271-284.
2. Nicolaisen, M.; Supronienė, S.; Nielsen, L.K.; Lazzaro, I.; Spliid, N.H.; Justesen, A.F. Real-time PCR for quantification of eleven individual *Fusarium* species in cereals. *Journal of Microbiological Methods* **2009**, *76*, 234-240.
3. Ward, T.J.; Clear, R.M.; Rooney, A.P.; O'Donnell, K.; Gaba, D.; Patrick, S.; Starkey, D.E.; Gilbert, J.; Geiser, D.M.; Nowicki, T.W. An adaptive evolutionary shift in *Fusarium* head blight pathogen populations is driving the rapid spread of more toxigenic *Fusarium graminearum* in North America. *Fungal Genetics and Biology* **2008**.
4. Dinolfo, M.I.; Barros, G.G.; Stenglein, S.A. Development of a PCR assay to detect the potential production of nivalenol in *Fusarium poae*. **2012**, *332*, 99-104.
